# Supplementary material for: A simple assay for glutathione in whole blood
Source: Royal Society of Chemistry journal article supplement (doi:10.1039/c5an00345h), 2015-01-01
Supplement: c5an00345h1.pdf [file c5an00345h1.pdf]

## A simple assay for glutathione in whole blood

Lovemore Hakuna, Brandon Doughan, Jorge O. Escobedo, and Robert M. Strongin\*

### *Supplementary Material*

#### Table of Contents

|                                                                                                   |    |
|---------------------------------------------------------------------------------------------------|----|
| General Methods and Instrumentation.....                                                          | S2 |
| Blood sampling, storage and extraction procedures.....                                            | S2 |
| Reduction of oxidized glutathione .....                                                           | S2 |
| Fractionation of the blood extract.....                                                           | S2 |
| Fluorescence detection of GSH.....                                                                | S2 |
| Fig. S1. Spectral response of probe 1 alone and in the presence of fractions F1-F6 at pH 7.4..... | S3 |
| Fig. S2 Spectral response of probe 1 towards various HSA fractions at pH 7.4.....                 | S3 |
| Fig. S3 Spectral response of probe 1 towards various Hb fractions at pH 7.4.....                  | S4 |

## **General Methods and Instrumentation**

All chemicals were purchased from Sigma-Aldrich or Fisher Scientific and used without further purification. Porcine blood was purchased from Lampire Biological Laboratories. The 0.45  $\mu\text{m}$  *Single StEP*<sup>TM</sup> PVDF filter vials were purchased from Thomson Instrument Company. UV-visible spectra were acquired on a Cary 50 UV-Vis spectrophotometer. Fluorescence spectra were collected on a Cary Eclipse (Agilent technologies) fluorescence spectrophotometer with slit widths set at 5 nm for both excitation and emission, respectively. The voltage of the photomultiplier was set at 550 V and pH measurements were carried out with an Orion 410A pH meter.

### **Blood sampling, storage and extraction procedures.**

Commercial pig blood (30  $\mu\text{L}$ ) is spotted on filter paper and dried for 24 h. The dried blood is extracted into a small volume of buffer (0.6 mL, 50 mM phosphate buffer pH 7.4).

### **Reduction of oxidized glutathione**

The extracted blood in buffer is incubated with immobilized tris(2-carboxyethyl)phosphine (TCEP) gel (1:1 v/v) at rt for 1 h with gentle shaking. Separation of the reduced plasma from the gel is achieved by filtration using a *Single StEP*<sup>TM</sup> 0.45  $\mu\text{m}$  PVDF filter vial.

### **Fractionation of the blood extract**

The reduced sample is passed through a PD MiniTrap<sup>TM</sup> G-25 Sephadex<sup>TM</sup> column. Fractions of 0.3 mL are collected. Fractions 1 to 3 contain proteins and Hb, fractions 4 and 5 contain the native GSH.

### **Fluorescence detection of GSH**

Acrylate probe **1** (2.5  $\mu\text{M}$ ) is added to the fractionated solutions in 2.0 mM CTAB media buffered at pH 7.4 (phosphate buffer, 50 mM). Spectra (UV-Vis and Fluorescence) were collected immediately upon addition of the probe.

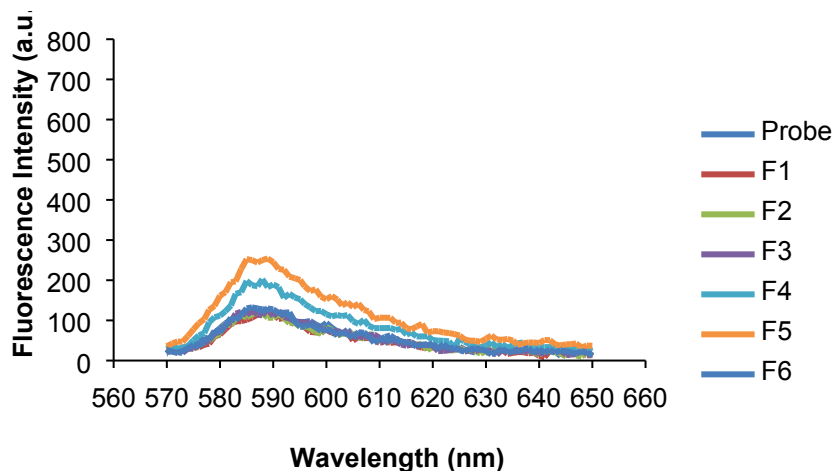

**Fig. S1** Spectral response of probe **1** alone and in the presence of fractions F1-F6 at pH 7.4. Fluorescence spectra ( $\lambda_{\text{ex}} = 565 \text{ nm}$ ) of probe ( $2.5 \mu\text{M}$ ) in solutions of GSH fractions and  $2.0 \text{ mM}$  CTAB media buffered at pH 7.4 (phosphate buffer,  $50 \text{ mM}$ ). Spectra were taken immediately upon addition of the probe.

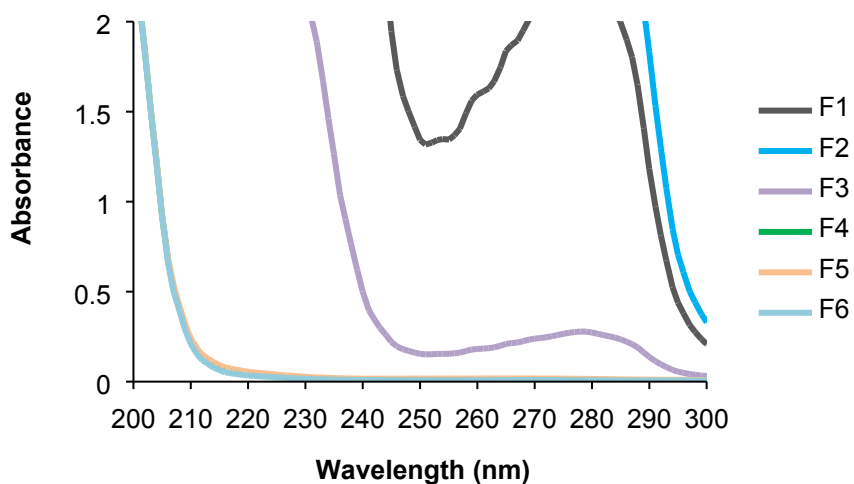

**Fig. S2** Spectral response of HSA fractions at pH 7.4. Absorption responses of HSA fractions in phosphate buffer ( $50 \text{ mM}$ ) at pH 7.4. Fractions were collected and immediately analyzed for absorption.

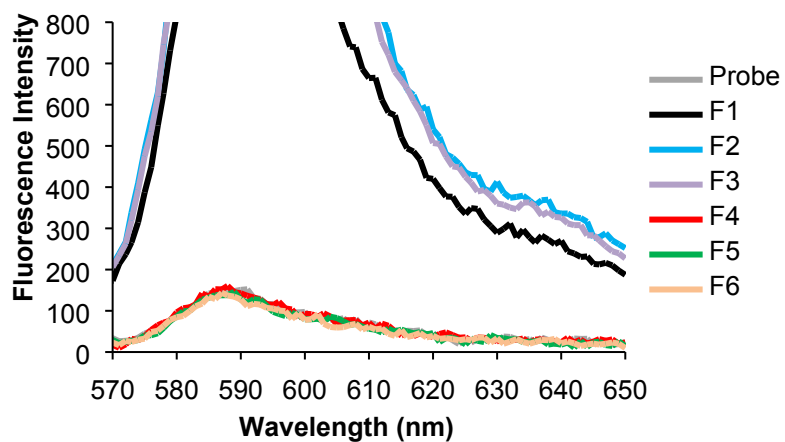

**Fig. S3** Spectral response of probe **1** towards various Hb fractions at pH 7.4. Fluorescence spectra ( $\lambda_{\text{ex}} = 565 \text{ nm}$ ) of probe ( $2.5 \mu\text{M}$ ) in solutions of DBS fractions and  $2.0 \text{ mM}$  CTAB media buffered at pH 7.4 (phosphate buffer,  $50 \text{ mM}$ ). Spectra were taken immediately upon addition of the probe.
